# Supplementary material for: Plasmon coupling-enhanced two-photon photoluminescence of Au@Ag core–shell nanoparticles and applications in the nuclease assay
Source: Royal Society of Chemistry journal article supplement (doi:10.1039/c5nr01409c), 2015-01-01
Supplement: c5nr01409c1.pdf [file c5nr01409c1.pdf]

## Electronic Supplementary Information

### Plasmon Coupling Enhanced Two-Photon Photoluminescence of Au@Ag Core-shell Nanoparticles and Applications in Nuclease Assay

Peiyan Yuan, Rizhao Ma, Nengyue Gao, Monalisa Garai, and Qing-Hua Xu

Department of Chemistry, National University of Singapore, 3 Science Drive 3,  
Singapore 117543

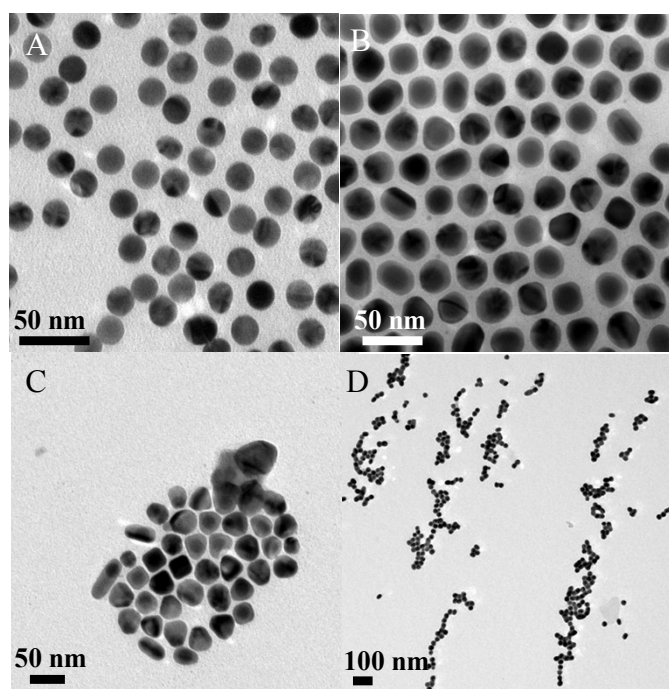

**Figure S1.** The TEM images of (A) Au NPs, (B) Au(19)@Ag(3.5) NPs, (C) Au(19)@Ag(5.5) NPs, (D) Assembly of Au(19)@Ag(3.5) NPs induced by cysteamine.

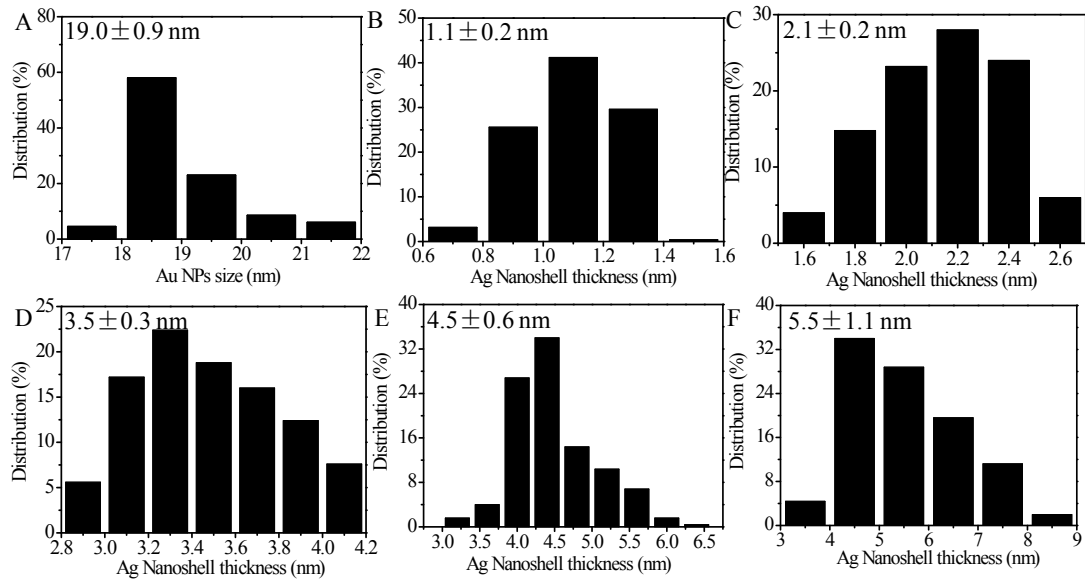

**Figure S2.** The histograms of sizes based on the size analysis of 250 nanoparticles from TEM images: (A) Au NPs and Au@Ag NPs with shell thickness of 1.1, 2.1, 3.5, 4.5 and 5.5 nm (B-F).

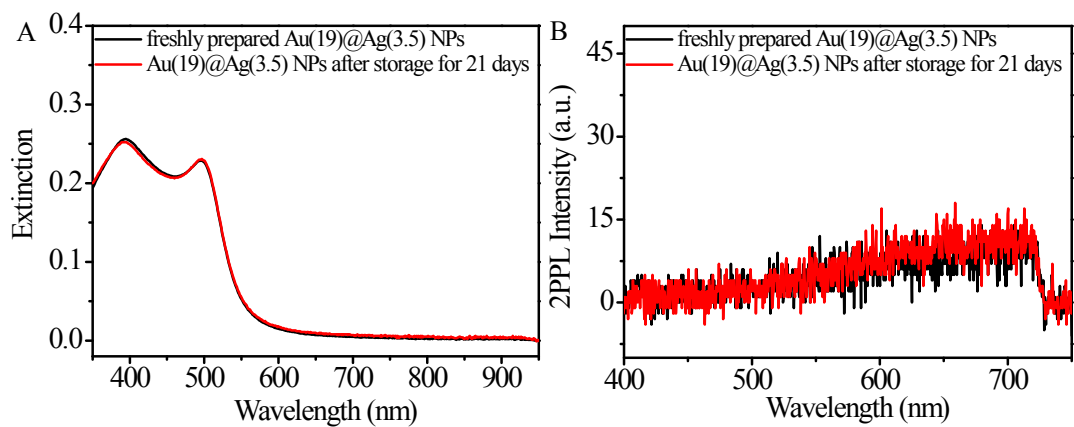

**Figure S3.** (A) Extinction and (B) 2PPL spectra of freshly prepared Au(19)@Ag(3.5) NPs and after storage for 21 days.

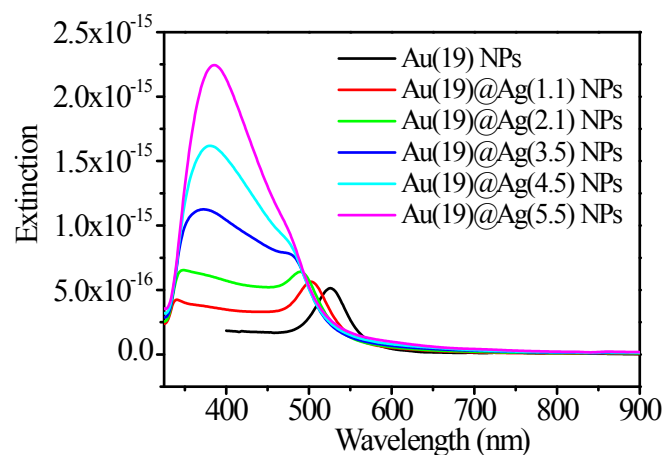

**Figure S4.** Simulated extinction spectra of 19 nm Au NP and Au@Ag NPs with Ag shell thickness of 1.1, 2.1, 4.5, and 5.5 nm.

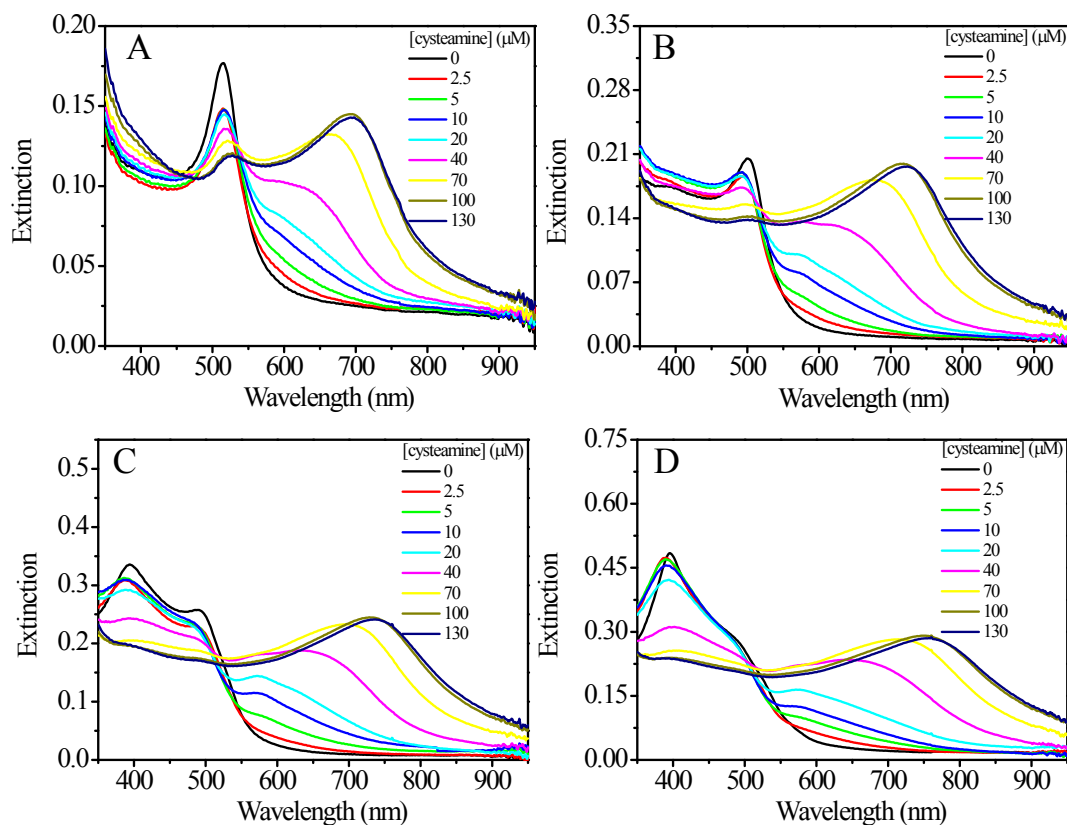

**Figure S5.** (A-D) Extinction spectra of Au@Ag NPs with Ag shell thickness of 1.1, 2.1, 4.5, and 5.5 nm before and after addition of cysteamine with different concentrations.

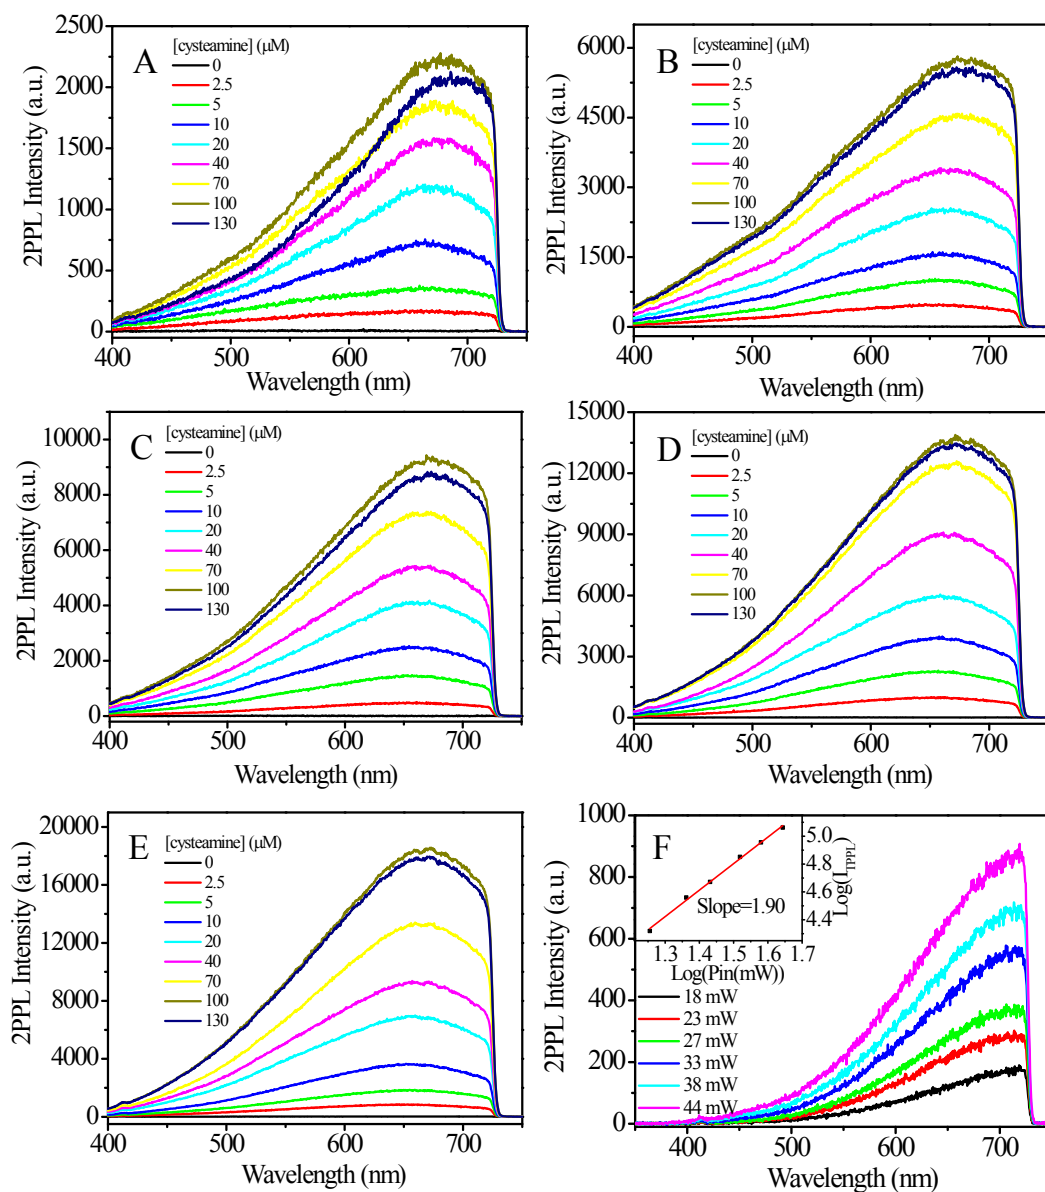

**Figure S6.** 2PPL spectra of (A) Au NPs and (B-E) Au@Ag NPs with Ag shell thickness of 1.1, 2.1, 4.5, and 5.5 nm before and after addition of cysteamine with different concentrations. (F) Excitation power dependence of the 2PPL for the sample of coupled Au(19)@Ag(3.5) NPs induced by 10 μM cysteamine in solution.

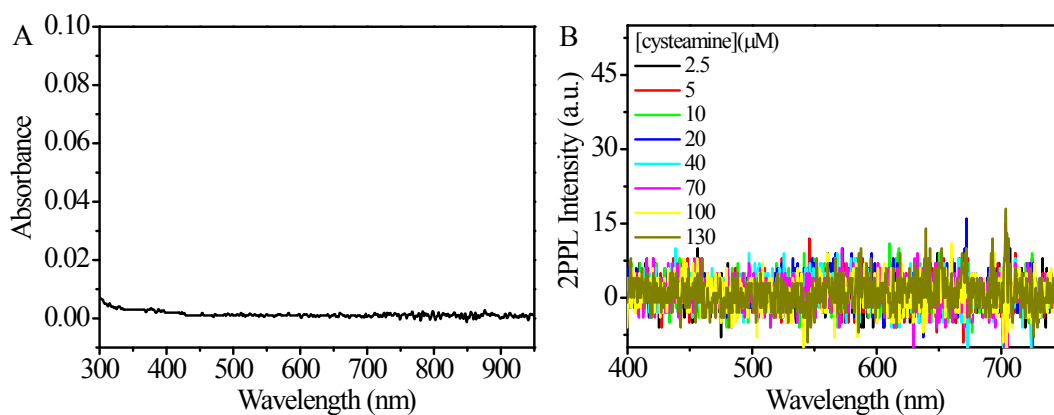

**Figure S7.** UV-Vis and 2PPL spectra of cysteamine molecules with different concentrations.

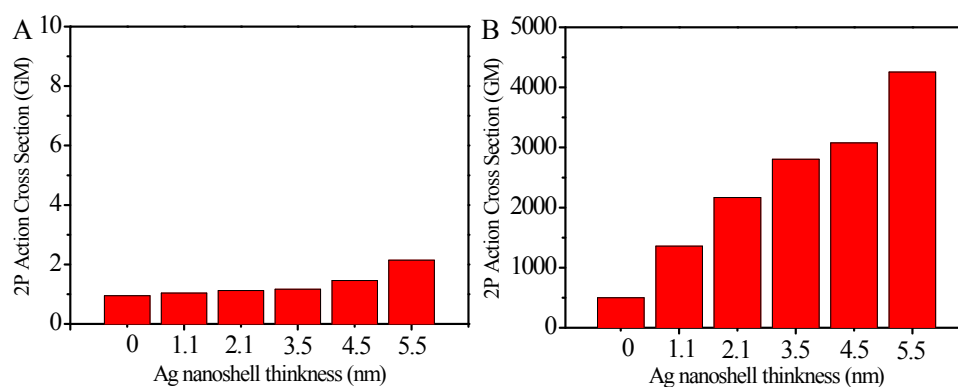

**Figure S8.** Two-photon action cross section of (A) isolated and (B) aggregated NPs coated with different thickness of Ag nanoshells.

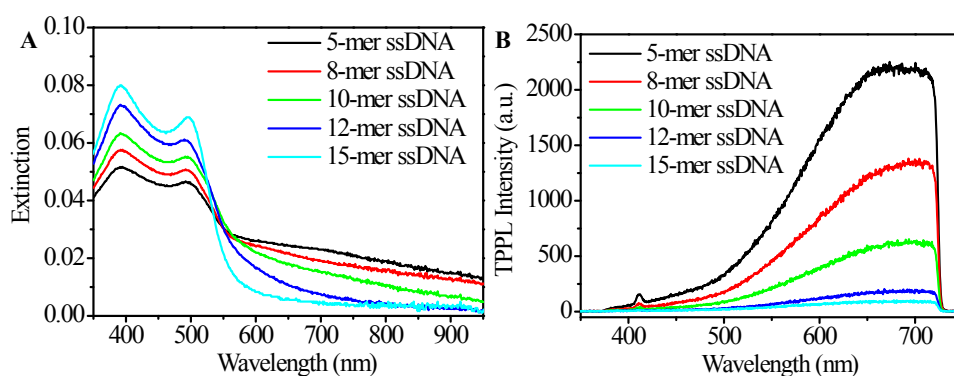

**Figure S9.** (A) Extinction and (B) 2PPL spectra of Au(19)@Ag(3.5) NPs after addition of different lengths of ssDNA in the presence of NaCl. The ssDNA sequences are 5'-TTAGC-3'(5-mer), 5'-ACCTTATC-3'(8-mer); 5'-GGTGCTAACT-3'(10-mer), 5'-ATCTTAACTGTG-3'(12-mer), and 5'-CCAACCACACCAACC-

3'(15-mer).

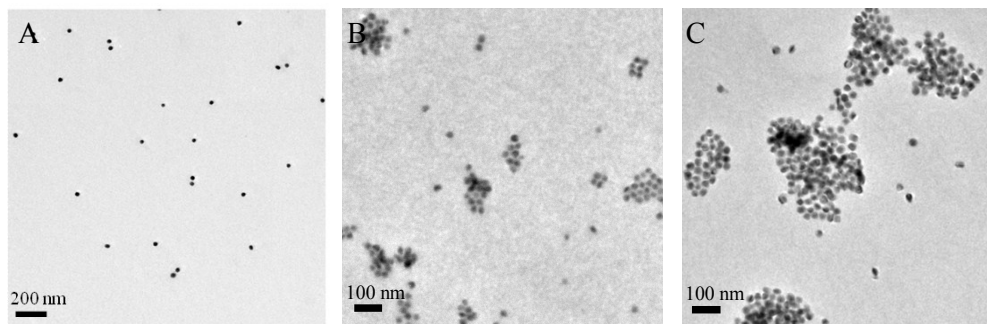

**Figure S10.** TEM images of Au(19)@Ag(3.5) NPs with the addition of different concentration of S1 nuclease (A) 0, (B)  $55 \times 10^{-6}$  U/ $\mu$ L, (C)  $165 \times 10^{-6}$  U/ $\mu$ L.

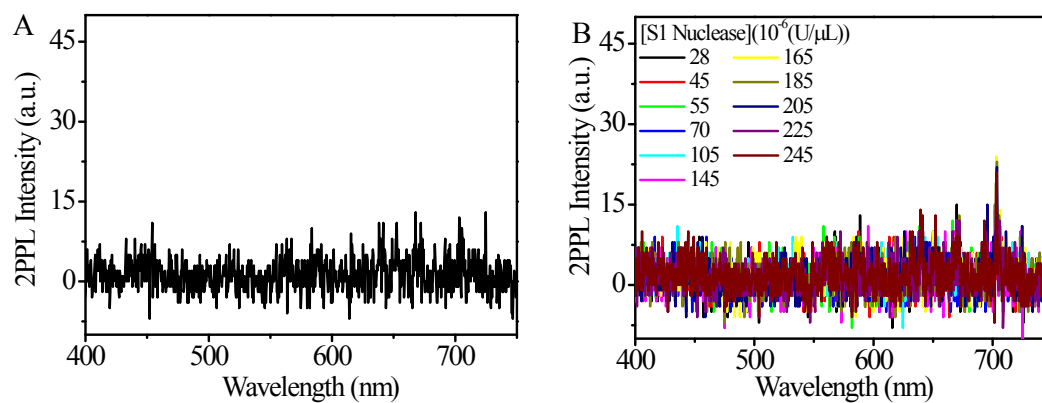

**Figure S11.** 2PPL spectra of (A) ssDNA ( $1 \times 10^{-6}$  M) and (B) S1 Nuclease with different concentrations.

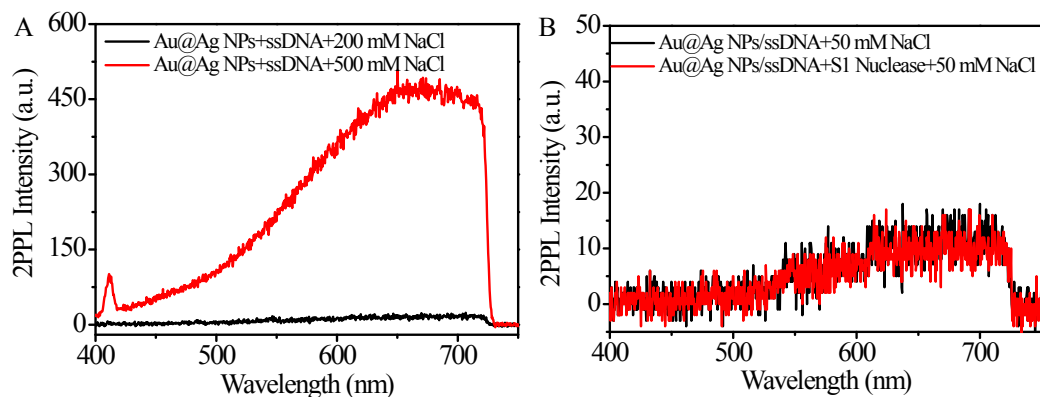

**Figure S12.** (A) [NaCl] effect on the 2PPL of the detection scheme; (B) 2PPL signals of Au(19)@Ag (3.5)NPs in the absence and presence of S1 nuclease ( $105 \times 10^{-6}$  U/ $\mu$ L) after incubation with 50 mM NaCl.

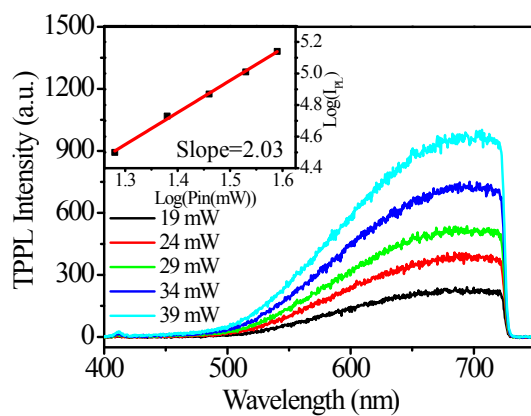

**Figure S13.** Excitation power dependence of the 2PPL for the sample of coupled Au(19)@Ag(3.5) NPs induced by  $165 \times 10^{-6}$  U/ $\mu$ L S1 nuclease in solution.
